# Supplementary material for: omiXcore: a web server for prediction of protein interactions with large RNA
Source: PubMed Central journal article supplement — Bioinformatics. 2017 Jun 15;33(19):3104–6. doi: 10.1093/bioinformatics/btx361 (PMC5870566; doi:10.1093/bioinformatics/btx361), 2017-06-15
Supplement: supplementary_material_btx361.pdf [file supplementary_material_btx361.pdf]

## **omiXcore: a web server for prediction of protein interactions with large RNA**

Alexandros Armaos<sup>1,2</sup>, Davide Cirillo<sup>1,2</sup> and Gian Gaetano Tartaglia<sup>1,2,3\*</sup>

<sup>1</sup>Gene Function and Evolution, Centre for Genomic Regulation (CRG), Dr. Aiguader 88, 08003 Barcelona, Spain.

<sup>2</sup>Universitat Pompeu Fabra (UPF), 08003 Barcelona, Spain

<sup>3</sup>Institucio Catalana de Recerca i Estudis Avançats (ICREA), 23 Passeig Lluís Companys, 08010 Barcelona, Spain

\* Corresponding author: Gian Gaetano Tartaglia. Telephone +34 933160116. Email: gian.tartaglia@crg.es.

---

### **Comparison with other methods**

For each RBP in our dataset (96 cases), we ranked interacting and non-interacting RNAs (10, 20, 50, 100 cases) using the experimental affinities  $A^{exp}$ . From low to high affinities, we compared *omiXcore* with *RPISeq-RF*, *RPISeq-SVM* (Muppirala *et al.*, 2011) and *Global Score* (Cirillo *et al.*, 2017). Both *RPISeq* and *Global Score* classify protein-RNA pairs into two categories (interacting / non-interacting) without considering the experimental affinities: the former uses sequence patterns for the predictions and the latter an architecture similar to *omiXcore* but with training done on PAR/HITS-CLIP data. *omiXcore* shows higher performances than *RPISeq* and *Global Score* in terms of Area under the ROC curve AUC (**Figure 1**), sensitivity (**Figure 2**), specificity (**Figure 3**) and Matthews correlation coefficient (**Figure 4**).

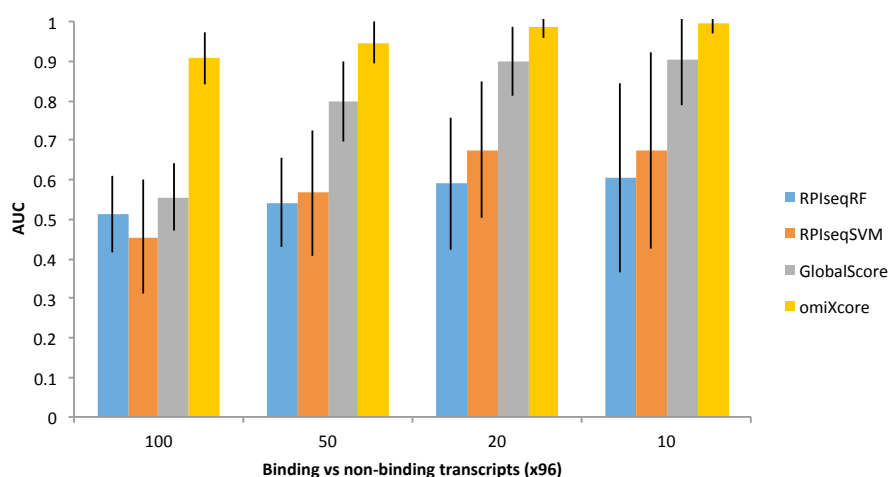

**Figure 1.** We ranked interacting and non-interacting RNAs (10, 20, 50, 100 cases) using the experimental affinities  $A^{exp}$ . The Area under the ROC curve AUC is used to measure the performances of *RPISeq-RF*, *RPISeq-SVM*, *Global Score* and *omiXcore*. Statistics (mean and standard deviation) is carried out per RBP (96 cases in total).

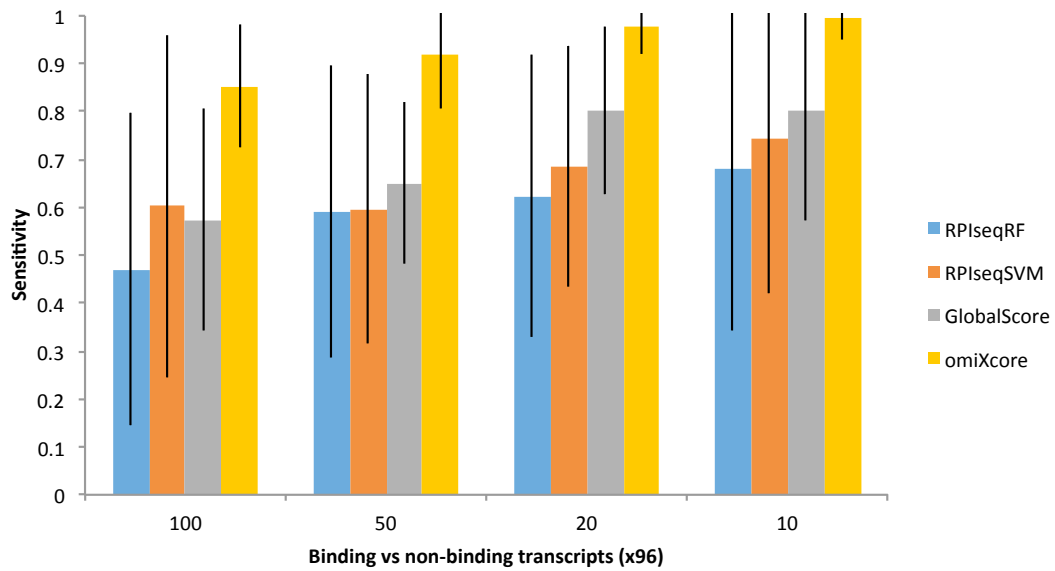

**Figure 2.** Sensitivity or true positive rate for RPISeq-RF, RPISeq-SVM, Global Score and omiXcore. See **Figure 1** for further details.

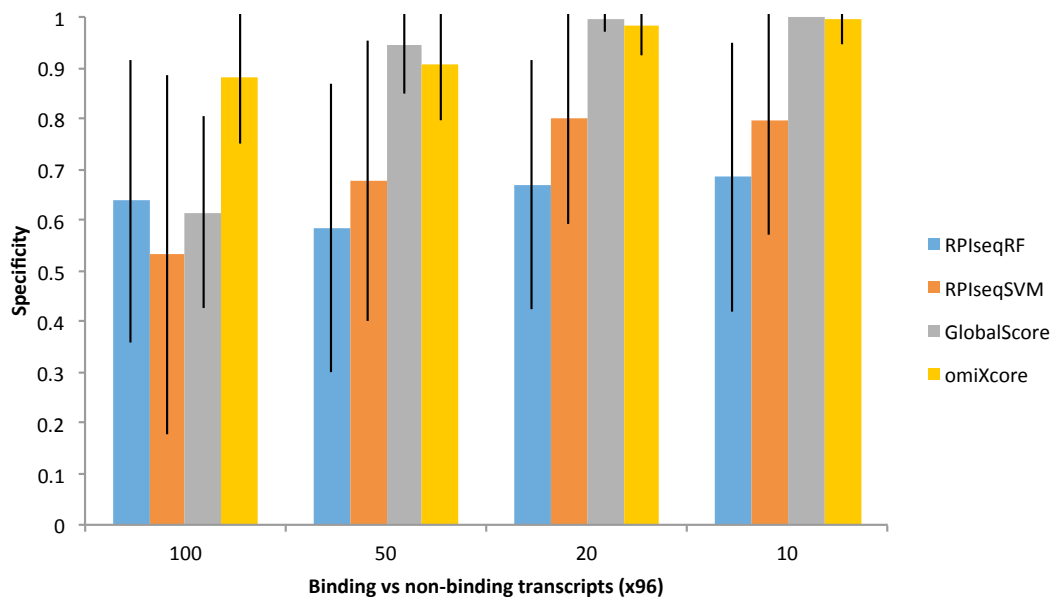

**Figure 3.** Specificity or true negative rate for RPISeq-RF, RPISeq-SVM, Global Score and omiXcore. See **Figure 1** for further details.

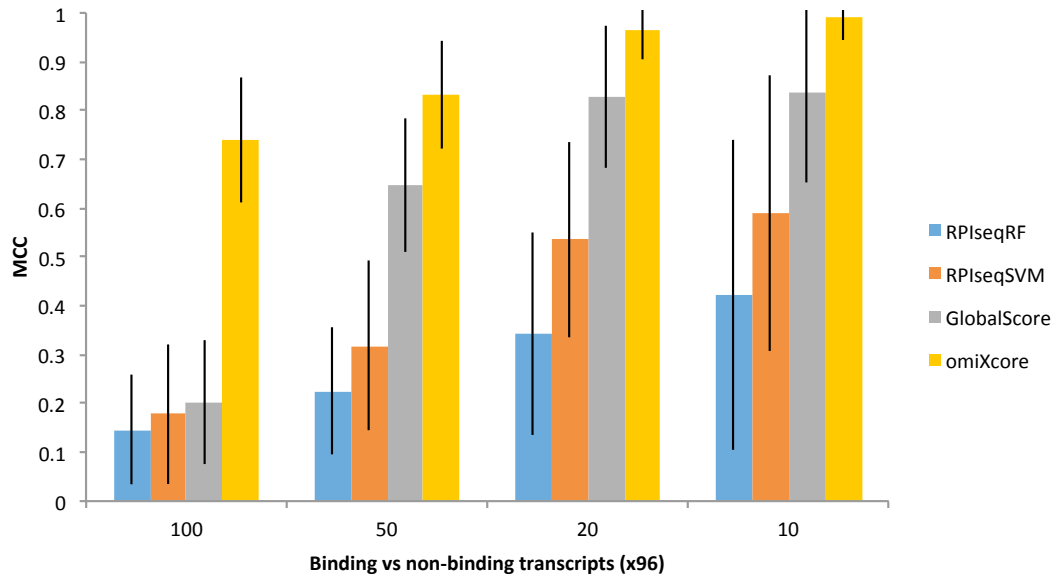

**Figure 4.** Matthews correlation coefficient or MCC for RPISeq-RF, RPISeq-SVM, Global Score and omiXcore. See **Figure 1** for further details.
